# Supplementary material for: Prevalence and Genetic Diversity of Giardia duodenalis and Cryptosporidium spp. among School Children in a Rural Area of the Amhara Region, North-West Ethiopia
Source: PLoS One. 2016 Jul 28;11(7):e0159992. doi: 10.1371/journal.pone.0159992 (PMC4965151; doi:10.1371/journal.pone.0159992)
Supplement: S4 Table — Reference sequences used in this study (highlighted in bold) were also included in the analyses. (XLS) [file pone.0159992.s004.xls]

## Sheet: Sequence Data
GDH Marker
GenBank accession no.	Assemblage/sub-assemblage	Origin	Primer GDHe_F																							Primer GDHi_F																				Primer GDHi_R
			T	C	A	A	C	G	T	Y	A	A	Y	C	G	Y	G	G	Y	T	T	C	C	G	T	C	A	G	T	A	C	A	A	C	T	C	Y	G	C	T	C	T	C	G	G	G	G	A	G
EF685690	A	Human	.	.	.	.	.	.	.	C	.	.	C	.	.	C	.	.	C	.	.	.	.	.	.	.	.	.	.	.	.	.	.	.	.	.	T	.	.	.	.	.	.	.	.	.	.	.	.
EF685686	A	Human	.	.	.	.	.	.	.	C	.	.	C	.	.	C	.	.	C	.	.	.	.	.	.	.	.	.	.	.	.	.	.	.	.	.	T	.	.	.	.	.	.	.	.	.	.	.	.
EF507679	A	Human	.	.	.	.	.	.	.	C	.	.	C	.	.	C	.	.	C	.	.	.	.	.	.	.	.	.	.	.	.	.	.	.	.	.	T	.	.	.	.	.	.	.	.	.	.	.	.
KM190753	A	Human	.	.	.	.	.	.	.	C	.	.	C	.	.	C	.	.	C	.	.	.	.	.	.	.	.	.	.	.	.	.	.	.	.	.	T	.	.	.	.	.	.	.	.	.	.	.	.
KM190742	A	Human	.	.	.	.	.	.	.	C	.	.	C	.	.	C	.	.	C	.	.	.	.	.	.	.	.	.	.	.	.	.	.	.	.	.	T	.	.	.	.	.	.	.	.	.	.	.	.
AB569385	A	Human	.	.	.	.	.	.	.	C	.	.	C	.	.	C	.	.	C	.	.	.	.	.	.	.	.	.	.	.	.	.	.	.	.	.	T	.	.	.	.	.	.	.	.	.	.	.	.
EF507599	A	Cat	.	.	.	.	.	.	.	C	.	.	C	.	.	C	.	.	C	.	.	.	.	.	.	.	.	.	.	.	.	.	.	.	.	.	T	.	.	.	.	.	.	.	.	.	.	.	.
AB569380	A	Cat	.	.	.	.	.	.	.	C	.	.	C	.	.	C	.	.	C	.	.	.	.	.	.	.	.	.	.	.	.	.	.	.	.	.	T	.	.	.	.	.	.	.	.	.	.	.	.
EF507642	A	Cattle	.	.	.	.	.	.	.	C	.	.	C	.	.	C	.	.	C	.	.	.	.	.	.	.	.	.	.	.	.	.	.	.	.	.	T	.	.	.	.	.	.	.	.	.	.	.	.
AB508813	A	Ferret	.	.	.	.	.	.	.	C	.	.	C	.	.	C	.	.	C	.	.	.	.	.	.	.	.	.	.	.	.	.	.	.	.	.	T	.	.	.	.	.	.	.	.	.	.	.	.
AY178754	B	Human	.	.	.	.	.	.	.	C	.	.	C	.	.	C	.	.	C	.	.	.	.	.	.	.	.	.	.	.	.	.	.	.	.	.	C	.	.	.	.	.	.	.	.	.	.	.	.
AY178755	B	Human	.	.	.	.	.	.	.	C	.	.	C	.	.	C	.	.	C	.	.	.	.	.	.	.	.	.	.	.	.	.	.	.	.	.	C	.	.	.	.	.	.	.	.	.	.	.	.
EF507654	B	Human	.	.	.	.	.	.	.	C	.	.	C	.	.	C	.	.	C	.	.	.	.	.	.	.	.	.	.	.	.	.	.	.	.	.	C	.	.	.	.	.	.	.	.	.	.	.	.
EF507672	B	Human	.	.	.	.	.	.	.	C	.	.	C	.	.	C	.	.	C	.	.	.	.	.	.	.	.	.	.	.	.	.	.	.	.	.	C	.	.	.	.	.	.	.	.	.	.	.	.
AY178756	B	Human	.	.	.	.	.	.	.	T	.	.	C	.	.	C	.	.	C	.	.	.	.	.	.	.	.	.	.	.	.	.	.	.	.	.	C	.	.	.	.	.	.	.	.	.	.	.	.
DQ840541	B	Human	.	.	.	.	.	.	.	C	.	.	C	.	.	C	.	.	C	.	.	.	.	.	.	.	.	.	.	.	.	.	.	.	.	.	C	.	.	.	.	.	.	.	.	.	.	.	.
KP687770	B	Beaver	.	.	.	.	.	.	.	C	.	.	C	.	.	C	.	.	C	.	.	.	.	.	.	.	.	.	.	.	.	.	.	.	.	.	C	.	.	.	.	.	.	.	.	.	.	.	.
KP687771	B	Water	.	.	.	.	.	.	.	C	.	.	C	.	.	C	.	.	C	.	.	.	.	.	.	.	.	.	.	.	.	.	.	.	.	.	C	.	.	.	.	.	.	.	.	.	.	.	.
L40509	AI	‒	.	.	.	.	.	.	.	C	.	.	C	.	.	C	.	.	C	.	.	.	.	.	.	.	.	.	.	.	.	.	.	.	.	.	T	.	.	.	.	.	.	.	.	.	.	.	.
L40510	AII	‒	.	.	.	.	.	.	.	C	.	.	C	.	.	C	.	.	C	.	.	.	.	.	.	.	.	.	.	.	.	.	.	.	.	.	T	.	.	.	.	.	.	.	.	.	.	.	.
AF069059	BIII	‒	.	.	.	.	.	.	.	T	.	.	C	.	.	C	.	.	C	.	.	.	.	.	.	.	.	.	.	.	.	.	.	.	.	.	C	.	.	.	.	.	.	.	.	.	.	.	.
L40508	BIV	‒	.	.	.	.	.	.	.	C	.	.	C	.	.	C	.	.	C	.	.	.	.	.	.	.	.	.	.	.	.	.	.	.	.	.	C	.	.	.	.	.	.	.	.	.	.	.	.
U60984	C	Dog	.	.	.	.	.	.	.	C	.	.	C	.	.	C	.	.	C	.	.	.	.	.	.	.	.	.	.	.	.	.	.	.	.	.	C	.	.	.	.	.	.	.	.	.	.	.	.
U60986	D	Dog	.	.	.	.	.	.	.	C	.	.	C	.	.	T	.	.	T	.	.	.	.	.	.	.	.	.	.	.	.	.	.	.	.	.	T	.	.	.	.	.	.	.	.	.	.	.	.
U47632	E	Cattle	.	.	.	.	.	.	.	C	.	.	T	.	.	C	.	.	C	.	.	.	.	.	.	.	.	.	.	.	.	.	.	.	.	.	C	.	.	.	.	.	.	.	.	.	.	.	.
AF069057	F	‒	.	T	.	.	.	.	.	C	.	.	C	.	.	C	.	.	C	.	.	.	.	.	.	.	.	.	.	.	.	.	.	.	.	.	C	.	.	C	.	.	.	.	.	.	.	.	.
BG Marker
GenBank accession no.	Assemblage/sub-assemblage	Origin	Primer G7_F																														Primer G99_F
			A	A	G	C	C	C	G	A	-	C	G	A	C	C	T	C	-	-	-	A	C	C	C	G	C	A	G	T	G	C	C	G	G	A	C	C	T	C	G	A	T	C	T	C	G	T	T
GQ329671	A	Human	G	.	.	.	.	T	.	.	A	.	.	.	T	.	.	.	G	A	G	.	.	G	G	.	.	.	T	.	.	.	.	A	.	G	.	.	.	.	.	T	.	.	G	A	.	G	A
AB508814	A	Ferret	G	.	.	.	.	T	.	.	A	.	.	.	T	.	.	.	G	A	G	.	.	G	G	.	.	.	T	.	.	.	.	A	.	G	.	.	.	.	.	T	.	.	G	A	.	G	A
DQ648777	A	Moose	G	.	.	.	.	T	.	.	A	.	.	.	.	.	.	.	G	A	G	.	.	G	G	.	.	.	T	C	.	.	.	A	.	G	.	.	.	.	.	T	.	.	G	A	.	G	A
DQ116609	A	Water	G	.	.	.	.	T	.	.	A	.	.	.	T	.	.	.	G	A	G	.	.	G	G	.	.	.	T	.	.	.	.	A	.	G	.	.	.	.	.	T	.	.	G	A	.	G	A
FN386482	A	Water	G	.	.	.	.	T	.	.	A	.	.	.	T	.	.	.	G	A	G	.	.	G	G	.	.	.	T	.	.	.	.	A	.	G	.	.	.	.	.	T	.	.	G	A	.	G	A
AB480877	B	Human	G	.	.	.	.	T	.	.	A	.	.	.	.	.	.	.	G	A	G	.	.	A	G	.	.	.	T	C	.	.	.	A	.	G	.	.	.	.	.	T	.	.	G	A	.	G	A
AB618785	B	Human	G	.	.	.	.	T	.	.	A	.	.	.	.	.	.	.	G	A	G	.	.	A	G	.	.	.	T	C	.	.	.	A	.	G	.	.	.	.	.	T	.	.	G	A	.	G	A
AY072726	B	Human	.	.	.	.	.	.	.	.	-	.	.	.	.	.	.	.	-	-	-	.	.	.	.	.	.	.	.	.	.	.	.	A	.	G	.	.	.	.	.	T	.	.	G	A	.	G	A
AY072727	B	Human	G	.	.	.	.	T	.	.	A	.	.	.	.	.	.	.	G	A	G	.	.	A	G	.	.	.	T	C	.	.	.	A	.	G	.	.	.	.	.	T	.	.	G	A	.	G	A
DQ923579	B	Human	G	.	.	.	.	T	.	.	A	.	.	.	.	.	.	.	G	A	G	.	.	A	G	.	.	.	T	C	.	.	.	A	.	G	.	.	.	.	.	T	.	.	G	A	.	G	A
KP687755	B	Human	G	.	.	.	.	T	.	.	A	.	.	.	.	.	.	.	G	A	G	.	.	A	G	.	.	.	T	C	.	.	.	A	.	G	.	.	.	.	.	T	.	.	G	A	.	G	A
HQ179582	B	Culture	G	.	.	.	.	T	.	.	A	.	.	.	.	.	.	.	G	A	G	.	.	A	G	.	.	.	T	C	.	.	.	A	.	G	.	.	.	.	.	T	.	.	G	A	.	G	A
AY655702	AI	Cattle	G	.	.	.	.	T	.	.	A	.	.	.	T	.	.	.	G	A	G	.	.	G	G	.	.	.	T	.	.	.	.	A	.	G	.	.	.	.	.	T	.	.	G	A	.	G	A
AY072723	AII	Human	G	.	.	.	.	T	.	.	A	.	.	.	T	.	.	.	G	A	G	.	.	G	G	.	.	.	T	.	.	.	.	A	.	G	.	.	.	.	.	T	.	.	G	A	.	G	A
AY072724	AIII	Human	G	.	.	.	T	T	.	.	A	.	.	.	.	.	.	.	G	A	G	.	.	G	G	.	.	.	T	.	.	.	.	A	.	G	.	.	.	.	.	T	.	.	G	A	.	G	A
AY072727	B	Human	G	.	.	.	.	T	.	.	A	.	.	.	.	.	.	.	G	A	G	.	.	A	G	.	.	.	T	C	.	.	.	A	.	G	.	.	.	.	.	T	.	.	G	A	.	G	A
AY545646	C	Dog	G	.	.	.	.	T	.	.	A	.	.	.	.	.	.	.	G	A	G	.	.	.	G	.	.	.	T	C	.	.	.	A	.	G	G	.	.	.	.	T	.	.	G	A	.	G	A
AY545647	D	Dog	.	.	.	.	.	.	.	.	-	.	.	.	.	.	.	.	-	-	-	.	.	.	.	.	.	.	.	.	.	.	.	A	A	.	G	.	.	.	C	T	.	.	G	A	.	G	A
AY545648	D	Dog	G	.	.	.	.	T	.	.	A	.	.	.	.	.	.	T	G	A	G	.	.	.	G	.	.	.	T	C	.	.	.	A	.	.	G	.	.	.	C	T	.	.	G	A	.	G	A
AY072729	EI	Human	G	.	.	.	.	T	.	.	A	.	.	.	.	.	.	.	G	A	G	.	.	G	G	.	.	.	T	C	.	.	.	A	.	G	.	.	.	.	.	T	.	.	G	A	.	G	A
AY545650	EII	Cattle	G	.	.	.	.	T	.	.	A	.	.	.	.	.	.	.	G	A	G	.	.	G	G	.	.	.	T	C	.	.	.	A	.	G	.	.	.	.	.	T	.	.	G	A	.	G	A
AY653159	EIII	Cattle	G	.	.	.	.	T	.	.	A	.	.	.	.	.	.	.	G	A	G	.	.	G	G	.	.	.	T	C	.	.	.	A	.	G	.	.	.	.	.	T	.	.	G	A	.	G	A
AY647264	F	Cat	G	.	.	.	.	T	.	.	A	.	.	.	.	.	.	.	G	A	G	.	.	G	G	.	.	.	T	C	.	.	.	A	.	G	.	.	.	.	.	T	.	.	G	A	.	G	A
[truncated: 50 more columns]

## Sheet: Info
Title	GDH_F.meg
Format
DataType	Nucleotide
CodeTable	Standard
30
Number Sites	46
Identical	.
Missing	?
Indel	-
